# Supplementary material for: The genetic architecture of repeated local adaptation to climate in distantly related plants
Source: PubMed Central journal article supplement (PMC11461274; doi:10.1038/s41559-024-02514-5), 2024-08-26
Supplement: 41559_2024_2514_MOESM1_ESM.pdf [file 41559_2024_2514_MOESM1_ESM.pdf]

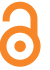

# The genetic architecture of repeated local adaptation to climate in distantly related plants

---

In the format provided by the authors and unedited

---

# **The genetic architecture of repeated local adaptation to climate in distantly-related plants - Supplementary Materials**

## Supplementary Methods:

1. Justification of repeatability threshold (FDR < 0.5)
2. Comparing the OrthoFinder tree against the proposed species tree
3. Covariance among climate variables
4. Justification of GEA methodology
5. Correcting for the effect of SNP count on  $Z_{WZA}$  heteroscedasticity
6. Alternative methods for deriving Orthogroup-level pleiotropy estimates
7. Randomisations to test the effect of Orthogroup structure

## Supplementary Results:

1. Orthogroups tested for repeatability are representative of general genes in GEA analyses
2. Relative Niche-Breadth and GEA power do not predict contributions to repeatability
3. RAOs are not enriched for phylogenetic signal of GEA results
4. Orthogroups tested for repeatability may exhibit more repeatability than those not tested
5. Reduced sampling of the global species range may reduce contributions to repeatability
6. Gene duplication may facilitate adaptive repeatability
7. Recombination does not drive signals of GEA or repeatability

## Supplementary Figures:

- Supplementary Figure 1: Summary of bioinformatics workflows
- Supplementary Figure 2: Associations between GEA power and species contributions to repeatability.
- Supplementary Figure 3: Associations between Niche Breadth (global mean) and species contributions to repeatability.
- Supplementary Figure 4: Associations between Niche Breadth (local mean) and species contributions to repeatability.
- Supplementary Figure 5: Brassicaceae PicMin analysis of tested vs untested orthogroups.
- Supplementary Figure 6: Summary of orthogroup occupancy.
- Supplementary Figure 7: Agreement between TimeTree phylogeny and OrthoFinder phylogeny.
- Supplementary Figure 8: Expected PicMin p-value distributions under the null.
- Supplementary Figure 9: Overlap of RAOs across climate variables.

- 40 ● Supplementary Figure 10: Demonstration of expected false-positives based on the
- 41 FDR.
- 42 ● Supplementary Figure 11: GEA ep-value distributions in tested vs untested
- 43 orthogroups.
- 44 ● Supplementary Figure 12: Associations between GEA ep-values and recombination
- 45 rate.

46

#### 47 Supplementary Tables:

- 48 ● Supplementary Table 1: Original dataset details
- 49 ● Supplementary Table 2: Orthogroup summary statistics
- 50 ● Supplementary Table 3: Full PicMin statistical test results for RAOs
- 51 ● Supplementary Table 4: Summary of species contributions across RAOs
- 52 ● Supplementary Table 5: GO terms for RAOs
- 53 ● Supplementary Table 6: *Arabidopsis thaliana* gene details in RAOs
- 54 ● Supplementary Table 7: GO enrichment test results
- 55 ● Supplementary Table 8: Estimates of pleiotropy for all tested orthogroups

56

## 57 SUPPLEMENTARY METHODS

58

### 59 **1) Justification of repeatability threshold (FDR < 0.5)**

60 The decision to categorise RAOs on the basis of an FDR-threshold of 0.5 was taken to include  
61 as many true-positives as possible in downstream functional enrichment analyses, while  
62 limiting the inclusion of false positives so that they do not make up the majority in our final  
63 set of RAOs. At this threshold, each RAO is at least as, or more, likely to be a true-positive  
64 than it is a false-positive. It is important to note that unlike p-values, FDR-adjusted p-value  
65 (q-value) thresholds do not carry any expectation for an expected number of q-values below  
66 the threshold, given the number of tests performed when all null hypotheses are true. For  
67 example, when performing 100, 1000 or 10,000 tests, a p-value threshold of 0.05 carries an  
68 expectation of approximately 5, 50, and 500 (5%) 'significant' tests below the threshold  
69 when all null hypotheses are true. In contrast, a q-value threshold of 0.5 carries an  
70 expectation of ~1 test being significant below the threshold (with a 50% chance of being a  
71 false-positive) regardless of the number of tests performed when all null hypotheses are  
72 true (Fig S9). This is because the FDR-threshold explicitly defines the proportion of results  
73 below that threshold that are expected to be false-positives, not the absolute number of  
74 false-positives. Consequently, an enrichment of tests with q-values <0.5 relative to null  
75 expectations can be considered a demonstration of an enrichment of true-positives. Put  
76 another way, an enrichment of tests with q-values <0.5 is an indication of a non-uniform p-  
77 value distribution that is weighted towards more lower values.

78

79 We tested this by randomly shuffling ep-values<sub>WZA</sub> within species within each climate  
80 variable 1000 times. We then performed all PicMin tests as for our observed data, FDR-  
81 adjusted the p-values within each climate variable, and summed together the number of  
82 orthogroups with an FDR q-value <0.5 across the 21 climate variables. Across the 1,000  
83 permutations, we observe an expected median of 36 (mean = 37.9) RAOs with an FDR of  
84 <0.5 (between 1 and 2 per climate variable, per randomisation, in line with random uniform  
85 expectations) and a maximum of 102. Similar expected values (median = 36, mean = 37.8,  
86 max = 102) were obtained when reducing RAOs to unique orthogroups (i.e. an orthogroup  
87 may be significant across multiple climate variables). In our observed data we detected 141  
88 RAOs, or 108 unique RAOs, representing a significant enrichment when compared to null  
89 expectations.

90

### 91 **2) Comparing the OrthoFinder tree against the proposed species tree**

92 The topology among major clades of the inferred species tree among reference genome  
93 species had good agreement with the equivalent species tree from TimeTree (Fig S7),  
94 although there were disagreements regarding sister taxa at the ancestral node of the  
95 Eudicot species (all species excluding *Pinus taeda*, *Picea abies* and *Panicum hallii*) and within  
96 *Populus* and Brassicaceae clades. Our species tree's grouping of *P. trichocarpa* and *P.*

97 *deltoides* as sisters is supported by phylogenomics work in *Populus*<sup>1</sup>, and our grouping of  
98 *Capsella rubella* and *Boechera stricta* as sisters within Brassicaceae is supported by  
99 additional phylogenomics<sup>2</sup>.

100

### 101 **3) Covariance among climate variables**

102 The 19 bioclim variables studied here are, of course, not independent of one another and  
103 exhibit substantial covariance. This is to be expected given various bioclim variables are  
104 calculated from other bioclim variables, for e.g. isothermality (BIO3) = 100 \* mean diurnal  
105 range (BIO2)/ temperature annual range (BIO7). In other cases, bioclim variables are simply  
106 similar observations, for e.g., maximum temperature in the warmest month (BIO5) and  
107 mean temperature in the warmest quarter (BIO10). Many studies seek to remove non-  
108 independence within environmental datasets through reducing dimensionality with  
109 principal component analysis (PCA) or redundancy analysis (RDA). Reducing dimensionality,  
110 whilst reducing nonindependence, does however add significant complications in terms of  
111 interpretation, where it can be unclear which environmental contributors to a combined  
112 variable are responsible for adaptation. Additionally, such approaches are undesirable in  
113 studies of multiple datasets where covariance of bioclim variables will vary among individual  
114 datasets, such that combined variables are incomparable. One approach to this issue may  
115 be to include environmental data from all datasets in a single dimensionality reduction,  
116 however this approach tends to maximise the significance of variation among datasets,  
117 which greatly exceeds variation within datasets, and is substantially less relevant to  
118 selection pressures and adaptation within datasets. Consequently, the simplest approach in  
119 terms of downstream interpretation and making comparisons across datasets is to maintain  
120 individual variables and acknowledge the potential non-independence of results among  
121 likely covarying variables (Fig S10).

122

123 Our climate change variables did exhibit some association with other bioclim variables,  
124 particularly those linked with seasonality (Extended Data 6). This is likely due to the  
125 increased variance of monthly max temperature and precipitation at sites with greater  
126 seasonality, which will dampen effect size estimates between decades.

127

### 128 **4) Justification of GEA methodology**

129 We performed GEAs using Kendall's  $\tau$  correlations that do not correct for population  
130 structure for several reasons. Firstly, the non-parametric correlation makes no assumptions  
131 about the distribution of allele frequency or environmental variation which is likely to vary  
132 substantially among datasets and climate variables. The Kendall's  $\tau$  correlation is a rank-  
133 based correlation similar to Spearman's  $\rho$  but with adjustments to handle ties. There are an  
134 abundance of approaches to perform GEA, some of the most popular being BayPass<sup>3</sup>,  
135 PCAdapt<sup>4</sup>, latent-factor mixed modelling (LFMM)<sup>5</sup>, and RDA<sup>6</sup>. Each of these approaches  
136 includes a correction for potentially spurious associations between allele frequencies and  
137 environment driven by spatial autocorrelation between population structure/gene flow and

138 environmental variation. In doing so, these approaches should theoretically reduce false-  
139 positives (Type-I error) but incur a drop in power (more false-negatives, Type-II error)<sup>7,8</sup>, as  
140 seen empirically in other studies<sup>9,10</sup>. However, a recent study deploying these methods on  
141 datasets created using individual-based simulations of evolution found substantial variation  
142 in realised power and false positive rates, with LFMM exhibiting a high power but a false  
143 positive rate near 100%, while RDA showed both very low power and low false positive  
144 rate<sup>11</sup>. Low power for methods including population structure correction was also observed  
145 by another simulation study assessing the accuracy of GEA methods<sup>12</sup>. Thus, methods that  
146 attempt to “control for population structure” cannot reliably disentangle the contributions  
147 of genetic drift and natural selection to observed patterns of allele frequency variation  
148 within a single species when axes of environmental variation align with axes of population  
149 structure. For studying climate variation, which is inherently spatial, axes of climatic  
150 variation are expected to align with spatial axes of population structure. This is especially  
151 the case in real empirical datasets where complex phenomena like allele surfing might be  
152 particularly problematic<sup>13</sup>.

153

154 In contrast, our method avoids the pitfalls of correction for population structure by instead  
155 relying on comparisons across species to more reliably detect the signature of natural  
156 selection repeatedly driving local adaptation. This works better than single-species analyses  
157 because if random genetic drift is driving evolution at a given gene in multiple species, we  
158 can specify the probability of repeatedly observing a strong association by chance and  
159 perform our tests accordingly. There is therefore no need to correct for population structure  
160 at the level of the within-species analysis, because this is controlled by our among-species  
161 probability model, as deployed in PicMin.

162

163 It should be noted however that some major historical expansion and contraction events are  
164 shared across species and may have facilitated admixture among closely-related species, for  
165 example in Northern Eurasia following glaciation-interglaciation cycles<sup>14</sup>. To rule out the  
166 potential for such introgression to be driving our observations, we visualised the shared  
167 contributions of closely-related species and general phylogenetic signal within our  
168 repeatability results and statistically tested phylogenetic signal in our repeatability results.

169

### 170 **5) Correcting for the effect of SNP count on $Z_{WZA}$ heteroscedasticity**

171 The uncorrected  $Z_{WZA}$  exhibits heteroscedasticity associated with increased  $Z_{WZA}$  variance in  
172 genes with more SNPs. We took several post-processing steps to account for this. Firstly, for  
173 the most SNP dense genes, we down sampled SNPs in genes with SNP counts above the 75%  
174 quantile to the 75% quantile, taking the per gene  $Z_{WZA}$  score as the mean  $Z_{WZA}$  calculated  
175 over 100 down sampled SNP sets. We also trimmed genes with minimal SNP information,  
176 removing genes with fewer than 5 SNPs, or if the 5% quantile of per gene SNP count was  
177 less than 5, we removed the bottom 5% of genes based on SNP count. This process  
178 therefore removed, at most, the bottom 5% of genes. We took a modified approach to the

179 WZA for standardising for SNP count across genes. Because the WZA is an approach  
180 designed to detect local adaptation, the WZA conservatively estimates the expected mean  
181 and variance of  $Z_{WZA}$  for a gene of given SNP count by approximating the relationship  
182 between  $Z_{WZA}$  mean and variance and SNP count using all observed data. However, true-  
183 positive GEA outliers could upwardly bias estimates of  $Z_{WZA}$  variance under this approach.  
184 Because we do not expect false-positive outliers to appear repeatedly across species, we  
185 adopted a less conservative approach and only estimated  $Z_{WZA}$  mean and variance from the  
186 lower half of  $Z_{WZA}$  scores ( $Z_{WZA} < 0$ ). For our analysis, this should improve power within  
187 species at the cost of potentially identifying more false-positives, but these should be  
188 removed later in the across-species repeatability analysis. Having an approximation for the  
189 expected mean and variance of  $Z_{WZA}$  for a gene with a given number of SNPs, we calculated  
190 a parametric p-value for each gene on the basis of the observed  $Z_{WZA}$  using the *pnorm()*  
191 function.

192

### 193 **6) Alternative methods for deriving Orthogroup-level pleiotropy estimates**

194 To condense our per gene estimates of tissue specificity to per orthogroup estimates, we  
195 initially approached this in two ways. We transformed  $\tau$  scores into per gene ep-values  
196 based on rank, treating either higher  $\tau$  estimates (and higher specificity) as lower ep-values  
197 or lower  $\tau$  values (and higher pleiotropy) as lower ep-values. We explored both of these  
198 approaches to ensure that choice of the most specific vs. least specific paralog per  
199 orthogroup did not affect the interpretation of pleiotropy drawn from this analysis. In each  
200 case, we then retained the minimum ep-value per orthogroup and corrected for paralogs  
201 with a Dunn-Šidák correction. Finally, we transformed per orthogroup ep-values to Z-scores  
202 ( $Z_\tau$ ) with a mean of 0 and sd of 1 across all orthogroups.

203

204 This approach therefore reflects our approach based on Tippett's method for condensing  
205 per gene GEA results to orthogroups. This approach was preferred over taking the mean  $\tau$   
206 per Orthogroup as there is no assumption that paralogs should retain specificity/pleiotropy.  
207 Indeed, taking the mean  $\tau$  per orthogroup greatly reduced the occurrence of high  $\tau$  values in  
208 the genome-wide distribution suggesting paralogs within orthogroups vary in their  
209 specificity of expression, which may occur due to neofunctionalisation or  
210 subfunctionalisation<sup>15</sup>. Whilst we observed that the number of paralogs decreases as  
211 evidence for repeatability increases (Extended Data 8B), it is important to note that this is  
212 not a feature introduced by the data structure and having to correct for the number of  
213 paralogs (Extended Data 8B and Fig 5E).

214

### 215 **7) Randomisations to test the effect of Orthogroup structure**

216 A potential bias between evidence for repeatability and duplication metrics could be  
217 introduced due to our method for processing per orthogroup ep-values requiring a Dunn-  
218 Šidák correction based on the number of paralogs (reducing the statistical power more in  
219 bigger orthogroups). To test this, we took the observed per gene ep-values associated with

220 all climate variables and shuffled them 100 times within species and within climate variables  
221 before correcting for the number of paralogs as normal. In total this creates 2,100  
222 randomised single-variable p-value sets (21 variables \* 100 randomisations). This approach  
223 therefore shuffles the biological information contained within the per gene ep-values but  
224 retains the orthogroup and paralog structure within the dataset across species and climate  
225 variables. We then ran PicMin on each of the 2,100 sets of randomised data and within each  
226 of the 100 randomised sets, calculated the minimum PicMin p-value across the 21  
227 randomised climate variables and used these to group orthogroups into deciles as for our  
228 observed data. We could then calculate the mean duplication metrics per decile as for our  
229 observed data, and repeated this 100 times to derive 100 randomised means per decile to  
230 compare against our observed decile means.  
231



## 232 SUPPLEMENTARY RESULTS

233

### 234 **1) Orthogroups tested for repeatability are representative of general genes in** 235 **GEA analyses**

236 A concern when testing for repeatability across species is whether or not the genes within  
237 orthogroups that are actually tested for repeatability are representative of all genes. Only  
238 genes that were in orthogroups with at least 20 species represented and with no fewer than  
239 10 paralogs were tested for repeatability with PicMin. This decision was made to reduce the  
240 total number of tests performed by only testing orthogroups with the most data and so  
241 greatest power to detect repeatability across diverse species. The genes in these tested  
242 orthogroups (N = 8,470) represented varying proportions of the total genes tested by GEA  
243 per species, ranging from 37.1% in *Picea abies* to 61.6% in *Panicum hallii* (Table S2). We first  
244 plotted the distributions of per orthogroup ep-values in tested vs not-tested orthogroups.  
245 These plots, summarised for precipitation in the dry month, demonstrate that in general the  
246 distribution of tested ep-values for a given climate variable were approximately uniform  
247 across most species and did not differ substantially from those that were not tested in most  
248 cases (Fig S11). If anything, orthogroups tested for repeatability were more likely to include  
249 probable adaptive genes than orthogroups that were not tested for repeatability, evidenced  
250 as inflated densities of lower per gene GEA ep-values in tested vs untested distributions.

251

### 252 **2) Relative Niche-Breadth and GEA power do not predict contributions to** 253 **repeatability**

254 The variability with which species contribute towards signatures of repeatability across  
255 climate variables (Fig 3A) begs the question of whether there are features of individual GEA  
256 (individual here referring to any given pair of species-climate) that explain this variation. The  
257 focus on individual species-climate tests, as opposed to the overall total number of RAOs,  
258 sets this question apart from those in the section “Reduced sampling of the global species  
259 range may reduce contributions to repeatability”. Variability of contribution could be  
260 explained by the power attached to each individual GEA, with the assumption being that  
261 species contribute more towards repeatability for GEA with greater power as a result of  
262 lower Type-II error. To examine this, we looked at two features of GEA that are likely to  
263 affect power: 1) the proportion of genetic variance that can be explained by climatic  
264 variation (hereafter GSEA - Genetic Structure Environment Association); 2) the relative  
265 niche-breadth (NB) of climatic variation, which may reflect strength of selection across the  
266 sampled range. We note that in contrast to the LOO analysis above, here, niche breadth is  
267 calculated in two different ways: one that represents the breadth relative to other species  
268 and another that accounts for scaling between the breadth measure and magnitude of the  
269 mean. As opposed to approximating the proportion of the global climate niche that has  
270 been sampled within each dataset, our measures of niche breadth here attempt to  
271 approximate comparable estimates of climate variability among species. For example, here

272 we are quantifying whether the sampling of species X experiences a greater variability of a  
273 given climate variable than the sampling of species Y, as opposed to measuring the extent to  
274 which the sampling of species X covers species X's global climate niche.

275

276 We calculated GSEA using partial redundancy analysis (pRDA). We constructed models to  
277 explain the variance in a response matrix of per site allele frequencies, randomly sampled to  
278 10,000 SNPs (with at least 90% of non-missing data per SNP), by predictor matrices of  
279 climate variation and spatial variation (latitude and longitude). We opted for latitude and  
280 longitude representations of space because these capture the assumptions of isolation-by-  
281 distance and spatial autocorrelations with the environment. Alternative approaches, such as  
282 Moran's spatial eigenvectors, accurately capture spatial information in terms of clustering of  
283 populations, but it is difficult to interpret these alongside how environmental variation may  
284 similarly covary with space. We produced a separate model for each bioclim variable  
285 individually, as opposed to modelling all together, in order to link genetic variance explained  
286 by individual climate variables back to individual variable GEAs. We considered the total  
287 proportion of genetic variance explained by climate as the combined partitions of genetic  
288 variation that could be explained exclusively by climate and that could be explained by  
289 either climate or space. If a greater proportion of neutral population structure is aligned  
290 with axes of environmental variation, GEA may exhibit reduced power as a result of truly  
291 adaptive genes co-segregating with an appreciable proportion of genome-wide neutral  
292 genetic variation<sup>11</sup>. We predicted that within species, the strongest contributions towards  
293 repeatability signatures would be observed when GSEA was lowest. Across species,  
294 however, we did not observe any consistent relationship between GSEA and contribution  
295 towards signatures of repeatability (Fig S2).

296

297 We calculated niche breadth in two ways to account for variability in means and distribution  
298 shapes across variables and species. Firstly, for each dataset and each climate variable, we  
299 calculated the species range (max - min) of climatic variation, and then standardised this  
300 based on the global range within climate variables across all species from locations with  
301 genome-sequenced samples included (i.e. not from GBIF). This estimate of niche breadth  
302 therefore captures the proportion of global variation present within an individual dataset,  
303 with the prediction being that the datasets contributing most to repeatability for a given  
304 climate variable will be those where this proportion is greatest. Secondly, we estimated  
305 niche-breadth by standardising species' range values by the mean climate value within each  
306 range. This estimate of niche breadth therefore contextualises previous estimates as a  
307 proportion of their mean. We opted to explore both of these estimates of niche breadth due  
308 to subtle differences in interpretation that come with standardising by either the global  
309 range or local mean. Take for example two ranges of precipitation variation between 100-  
310 200 mm and 3000-3100 mm. Each of these ranges is equivalent if standardised by the global  
311 range, however we expect that a 100mm difference in rainfall may be more significant if it  
312 represents a doubling in annual precipitation relative to a small increase. Standardising by

313 the local mean therefore captures differences in relative niche breadth. In each case, we  
314 observe no evidence that niche breadth variation is associated with contributions towards  
315 signatures of repeatability (Fig S3-S4).

316

### 317 **3) RAOs are not enriched for phylogenetic signal of GEA results**

318 It is expected that species that are more closely-related may contribute disproportionately  
319 to signatures of repeatability, particularly if closely-related species share adaptive variation.  
320 Consequently, clusters of closely-related species, for example our Brassicaceae species or  
321 *Helianthus* or *Eucalyptus* species groups, may be disproportionate contributors to  
322 repeatability in our dataset. On the other hand, the PicMin test assumes that each species is  
323 independently evolving, so shared standing variation among closely-related species could  
324 introduce non-independence into the test. Thus, it is important to assess whether our  
325 results include a signal of closely-related species having increased repeatability. A visual  
326 inspection of contributions towards repeatability suggests that this is not the case (Fig 3B,  
327 Extended Data 3). However, we also tested each RAO for phylogenetic signal in the  
328 distribution of GEA ep-values among species tips. To do this, we took each of the 141 RAOs  
329 (some of the 108 unique RAOs were represented across multiple climate variables) and used  
330 the *phytools::phylosig()*<sup>16</sup> function to test each orthogroup for phylogenetic signal of -log<sub>10</sub>-  
331 transformed GEA p-values against random expectations under Brownian evolution. We used  
332 the 'K' method<sup>17</sup> with 1,000 sims (we also used the 'lambda' method and obtained the  
333 same result). To derive a species-level phylogenetic tree with branch lengths (Extended Data  
334 2A), we curated our reference genome tree (Fig 1D) and where multiple species were  
335 mapped to the same reference genome (for example *Helianthus* and *Eucalyptus*) we split  
336 tips to include all species and separated species by the minimum branch length in the  
337 original reference genome phylogeny. We then asked whether the average 'K' value  
338 observed in the 141 RAOs differed from 1,000 random draws of 141 orthogroups (excluding  
339 the 141 RAOs).

340

341 There was limited evidence of significant phylogenetic signal of GEA ep-values within the  
342 141 RAOs. Seven RAOs had phylogenetic clustering signal p-values <0.05, in line with null  
343 expectations (5% of tests). The mean 'K' value of observed RAOs was 0.081, which was  
344 actually lower than the mean 'K' (0.086) of 1,000 randomly chosen groups of orthogroups  
345 (Extended Data 2B). These results demonstrate that there was limited evidence of  
346 phylogenetic signal driving signatures of repeatability within RAOs, and RAOs did not exhibit  
347 elevated phylogenetic signal relative to orthogroups without evidence of adaptive  
348 repeatability.

349

### 350 **4) Orthogroups tested for repeatability may exhibit more repeatability than** 351 **those not tested**

352 It is expected that repeatability should decline with increasing TMRCA between species. This  
353 is due to several factors, including reduced likelihood of sharing common adaptive variants,

354 functional divergence of genes, and changes to species general biology and physiology<sup>18</sup>. We  
355 observed no evidence of phylogenetic signal in our RAOs, however. One explanation for this  
356 may be that the orthogroups tested for repeatability are reasonably conserved, potentially  
357 negating the expected trend at the genome-level of reduced repeatability through increased  
358 functional divergence of genes. To examine this, we repeated the PicMin repeatability  
359 analyses over a set of orthogroups found in the 7 Brassicaceae species in our dataset.

360

361 This set of orthogroups comprised 6,914 orthogroups in total. Of these, 5,620 were tested in  
362 the original analysis ('Full Dataset'), and 1,294 were tested here for the first time ('Brassica  
363 Dataset'). Of the 1,294 newly tested orthogroups, 374 orthogroups contained genes that  
364 were only found in Brassicaceae genomes ('Brassica Unique'). We repeated PicMin analyses  
365 using the same method as for the main analysis, and tested repeatability for orthogroups  
366 with all seven species.

367

368 In total, 25 orthogroups exhibited evidence of repeatability at our FDR <0.5 threshold, all of  
369 which were orthogroups previously tested in our main analysis. In addition to this,  
370 visualising the distribution of PicMin p-values across all climate variables by orthogroup  
371 status highlighted that orthogroups that had been tested in our main analysis exhibited  
372 stronger evidence of repeatability in this analysis (Fig S5). This result was consistent if  
373 orthogroups were grouped by previously-tested vs newly-tested, or unique to Brassicaceae  
374 vs not unique. In this re-analysis, all orthogroups had equal statistical power (7 species), and  
375 so this variability cannot be explained by variable power in orthogroups that were not  
376 tested previously. These results lend support to the idea that orthogroups with higher levels  
377 of conservation across species (i.e. those that contained enough species to be tested in our  
378 main analysis) may be more likely to be repeatedly involved in adaptation. A potential  
379 mechanism for this might be a reduction in functional divergence that is expected with  
380 increased conservation across diverse species.

381

### 382 ***5) Reduced sampling of the global species range may reduce contributions to*** 383 ***repeatability***

384 To address the potential of sampling bias in the repeatability analyses, and to explore  
385 variability among species in contributing towards repeatability, we quantified a range of  
386 features related to dataset quality. To understand how these features may affect the  
387 repeatability analyses, we used a Leave-One-Out (LOO) cross-validation approach that  
388 involved removing each species from the overall PicMin analysis and repeating the PicMin  
389 process, whilst accounting for the N-1 species. This LOO procedure produced a species-level  
390 value reflecting the increase or decrease in the number of FDR <0.5 orthogroups detected,  
391 which we then compared against our dataset quality features.

392

393 Dataset quality features were selected to reflect either biological or technical limitations of  
394 datasets and included the following: 1) Approximate climate extent covered by sequenced

395 dataset, relative to total climatic range of the species; 2) approximate geographic extent  
396 covered by the dataset, relative to global range; 3) percentage of total genes within the  
397 genome covered by sequencing data; 4) number of SNPs (averaged through datasets within  
398 species) per species; 5) number of individuals sampled (averaged through datasets within  
399 species) per species; 6) number of sampling locations (averaged through datasets within  
400 species) per species; 7) ratio of the number of individuals to number of sampling locations.

401

402 Features 1) and 2) were approximated by pulling all occurrence data for each species from  
403 GBIF (GBIF Occurrence Download <https://doi.org/10.15468/dl.mcbger> Accessed from R via  
404 *rgbif* [<https://github.com/ropensci/rgbif>] on 2024-05-03). For 1), the climatic niche of each  
405 species was calculated by extracting bioclim variables for all locations in GBIF and reducing  
406 dimensionality using scaled principal components analysis (PCA). The climate values for the  
407 sampled ranges were then projected onto the species-specific climate PCA. To compare the  
408 sampled niche to the global niche for each species, we calculated hypervolume overlap over  
409 each PC using dynamic range boxes (*dynRB\_Pn* function in the *dynRB* package<sup>19</sup>). Overall  
410 hypervolume overlap was then calculated as the weighted mean overlap across individual  
411 principal components, where weights reflected the relevant eigenvalues, i.e. overlap on PC1  
412 is more significant than PC10. For 2), we used the same occurrence data to calculate the  
413 average distance (in km) between a given pair of species occurrence points. Where species  
414 had >1000 occurrences in GBIF, we took 100 random subsets of 1,000 occurrences and  
415 performed pairwise distance calculations within subsets, keeping only intracontinental  
416 distances to avoid including distances across oceans. For our sampled data points, we took  
417 the same approach and calculated the mean distance (in km) between all paired locations.  
418 We then calculated the ratio of the average sampled distance to the average global  
419 distances. Whilst this measure is crude, it should capture the main information we are  
420 interested in here, i.e. distinguishing between a species where we have data from across the  
421 majority of its known geographic distribution as opposed to a small minority. Feature 3) was  
422 calculated on the basis of the number of genes with  $Z_{WZA}$  scores relative to the number of  
423 genes in the total OrthoFinder2 outputs for each genome. Features 4-7 were extracted from  
424 each of the original VCF files, and are found in Table S1. Features 1 and 2 reflect biological  
425 quality, in terms of the extent of biological variation sampled within our datasets. The  
426 remaining features reflect technical quality related to the sequencing of samples and  
427 statistical power.

428

429 Removing individual species had a variable effect on the retained number of PicMin RAOs  
430 (FDR <0.5 & <0.3, Extended Data 4A-B). The largest increase in the number of RAOs (relative  
431 to the total dataset count of 141 RAOs) was observed when removing *Amaranthus*  
432 *tuberculatus* (211 FDR <0.5 RAOs), whereas the largest reduction in RAOs was observed  
433 when removing either *Eucalyptus albens* or *E. sideroxylon* (89 FDR <0.5 RAOs). Interestingly,  
434 despite the removal of either of these *Eucalyptus* resulting in the same number of retained  
435 RAOs, the RAOs that were removed from the full set were generally not the same.

436 Specifically, of the RAOs removed from the original 141 by removing each of *E. albens* and *E.*  
437 *sideroxylon*, only 50.6% were shared between the two eucalypts. This result is in agreement  
438 with the results presented in Fig 3B and Extended Data 2, suggesting a negligible influence  
439 of common or shared contributions towards repeatability between these species, or any  
440 closely-related species. In general, the change in the number of RAOs compared to when  
441 including all species reflected a mix of original RAOs dropping out and previously  
442 undetected RAOs becoming more significant. To give an example, of the 89 RAOs observed  
443 when excluding *E. sideroxylon*, 74 of these were retained in the original 141 and 15 were  
444 newly detected.

445

446 When exploring the effect of dataset features on the variability of the LOO results among  
447 species (Extended Data 4C), the strongest associations were negative associations between  
448 the change in FDR <0.5 RAOs (LOO CV Change) and geographic sampling extent (Global  
449 Range Distance Ratio,  $\rho = -0.43$ ) and climate niche sampling breadth (Global Climate Niche  
450 Overlap,  $\rho = -0.33$ ) (Extended Data 4D). This highlights that the main feature of datasets  
451 underlying the potential power of each species in our repeatability analysis is biological, i.e.  
452 the extent of global species-level biological variation that has been sampled. Specifically, it  
453 suggests that removing species where less of the natural variation has been sampled tends  
454 to increase the number of RAOs, and vice-versa.

455

#### 456 **6) Gene duplication may facilitate adaptive repeatability**

457 Gene duplication has been invoked to explain repeatability variation, notably among conifer  
458 species<sup>20</sup>. Duplications may facilitate repeatable evolution by alleviating functional  
459 constraints through sub- or neofunctionalisation<sup>15</sup>. We asked whether RAOs differed for the  
460 total number of duplications within each gene tree, the number of species-specific  
461 duplications (where all nodes downstream of the duplication involve a single genome), the  
462 number of single-copy genes within each gene tree, and whether species contributing  
463 towards repeatability within orthogroups were enriched for duplications (Extended Data  
464 8A).

465

466 Our per orthogroup pleiotropy metrics were negatively associated with the number of gene  
467 duplication events per orthogroup (expression breadth:  $\rho = -0.328$ ,  $p < 2.2 \cdot 10^{-16}$ ; node degree:  $\rho$   
468  $= -0.383$ ,  $p < 2.2 \cdot 10^{-16}$ ; Fig 5E). Importantly, however, randomising per gene pleiotropy scores  
469 did not produce any association with the number of duplication events per orthogroup,  
470 demonstrating that the orthogroup structure and analysis is not expected to produce  
471 spurious associations.

472

473 As observed for pleiotropy, grouping orthogroups by their strongest evidence of  
474 repeatability highlighted a clear tendency for gene duplication to vary with evidence of  
475 adaptive repeatability. Orthogroups with stronger evidence of repeatability were  
476 characterised by fewer duplications, fewer species-specific duplications, and a greater

477 number of single-copy genes (Extended Data 8B). Importantly, these associations with gene  
478 duplication were not observed following randomisation within species of per gene GEA ep-  
479 values (black bars in Extended Data 8B). Species contributing towards repeatability in RAOs  
480 (PicMin FDR < 0.5) did not differ in terms of per species duplications from species with low  
481 GEA ep-values (<0.1) from randomly drawn orthogroups (10,000 permutations,  $p = 0.127$ ).  
482 These results therefore suggest that orthogroups with reduced gene duplication may be  
483 more likely to be repeatedly associated with adaptation, however it may be difficult to  
484 separate out the effects of pleiotropy and duplication, given duplication may promote  
485 subfunctionilisation and specialism among duplicated genes<sup>21</sup>. Indeed, per orthogroup  
486 duplication events were negatively associated with per orthogroup pleiotropy metrics (Fig  
487 5E).

488

489 Interestingly, however, species that were contributing towards repeatability within RAOs  
490 were less likely to be single-copy genes within RAOs with respect to random expectations  
491 derived from taking species with low GEA ep-values within random sets of orthogroups  
492 (Extended Data 7C). This result therefore contradicts the notion that repeatedly adaptive  
493 orthogroups may be associated with reduced duplication, and is in line with previous  
494 observations in conifers<sup>20</sup>. The discrepancy between these results may be explainable due to  
495 noisy per orthogroup estimates as opposed to potentially more relevant per species  
496 estimates of duplication.

497

### 498 **7) Recombination does not drive signals of GEA or repeatability**

499 Recombination rate landscapes, potentially shared to some extent among closely-related  
500 species, represent a potential source of bias within our analyses due to the risk that WZA  
501 variance may be greatest in regions of low recombination<sup>22</sup>. It is unlikely that this source of  
502 bias has a strong effect on our repeatability results, given repeatability is observed to vary  
503 among climate variables, all of which are expected to be influenced in the same way by the  
504 recombination landscapes within species. Still, we wanted to quantify its effect here for a  
505 subset of datasets for which recombination rates were available. Recombination rates were  
506 acquired for the following genomes: *Arabis alpina*<sup>23</sup>, *Arabidopsis lyrata*<sup>24</sup>, *Arabidopsis*  
507 *thaliana*<sup>25</sup> and *Helianthus annuus*<sup>26</sup>. These corresponded to nine individual datasets. To  
508 examine associations between recombination rate and GEA results (WZA scores corrected  
509 for SNP count), we plotted GEA ep-values against ep-values estimated for individual genes  
510 according to the weighted-mean recombination rate over a given gene. We plotted four  
511 random climate variables as a demonstration (Fig S12).

512

513 Across the Brassicaceae, there is no observable association between recombination rate and  
514 GEA. Each distribution plotted is a uniform distribution of empirical p-values, thus the  
515 expected plot when association is minimal reflects regions of density across the whole  
516 plotting space. The association is complicated for the *Helianthus* species, however,  
517 exhibiting contrasting associations. *H. annuus*, and to a lesser extent *H. argophyllus*, exhibit

518 an association between GEA variance and low recombination, which can be seen particularly  
519 clearly for max temp warmest month and *H. annuus* as all high and low GEA ep-values are  
520 observed in regions of low recombination (low recombination ep-value). Conversely, *H.*  
521 *petiolaris* exhibits a linear association whereby GEA p-values are generally lower in regions  
522 of low recombination. This discrepancy between the Brassicaceae and *Helianthus* may  
523 reflect the known adaptive significance of regions of low recombination in these data from  
524 *Helianthus spp.*<sup>27</sup>, therefore these associations may be genuine and biological. In support of  
525 this, the association between GEA results and recombination appear stronger in accordance  
526 with the proportion of each species genome where large non-recombining regions are  
527 observed in the original study (*H. argophyllus* has the lowest proportion of the genome  
528 covered, *H. petiolaris* has the most). Importantly, given that the effect of recombination is  
529 not observed across all datasets, it is unlikely to bias our estimates of repeatability. In  
530 addition, even though *Helianthus spp.* do exhibit an association, they do not show any  
531 evidence of contributing excessively to our estimates of repeatability in Fig 3A-B.

532

533 We also looked into whether genes within the same orthogroup were repeatedly associated  
534 with low recombination across species, and whether these overlapped significantly with our  
535 RAOs identified across GEA. To do this, we looked at the recombination rates from each of  
536 the four species and condensed the ep-values to per orthogroup p-values using the same  
537 Tippett's approach as was used for the GEA data. We then tested the same 8,470  
538 orthogroups that were tested for climate data using PicMin, in order to identify orthogroups  
539 with repeatedly low recombination across the four species. We also removed orthogroups  
540 that did not have recombination estimates in all four species, leaving 7,446 to test with  
541 PicMin. This analysis identified 9 orthogroups with evidence of repeatedly low  
542 recombination across species at an FDR < 0.5. Of these 9, 1 was also identified as an RAO  
543 associated with climate at FDR < 0.5 (N = 108). An intersection of 1 does represent an almost  
544 ten-fold enrichment above the random expectation of 0.11, however it also only represents  
545 >1% of the identified RAOs associated with climate adaptation. From this, we can conclude  
546 that some repeatability identified through our GEA analyses may be driven by common  
547 regions of low recombination, however the extent of this effect is likely minimal.

548

549



550 SUPPLEMENTARY FIGURES

551

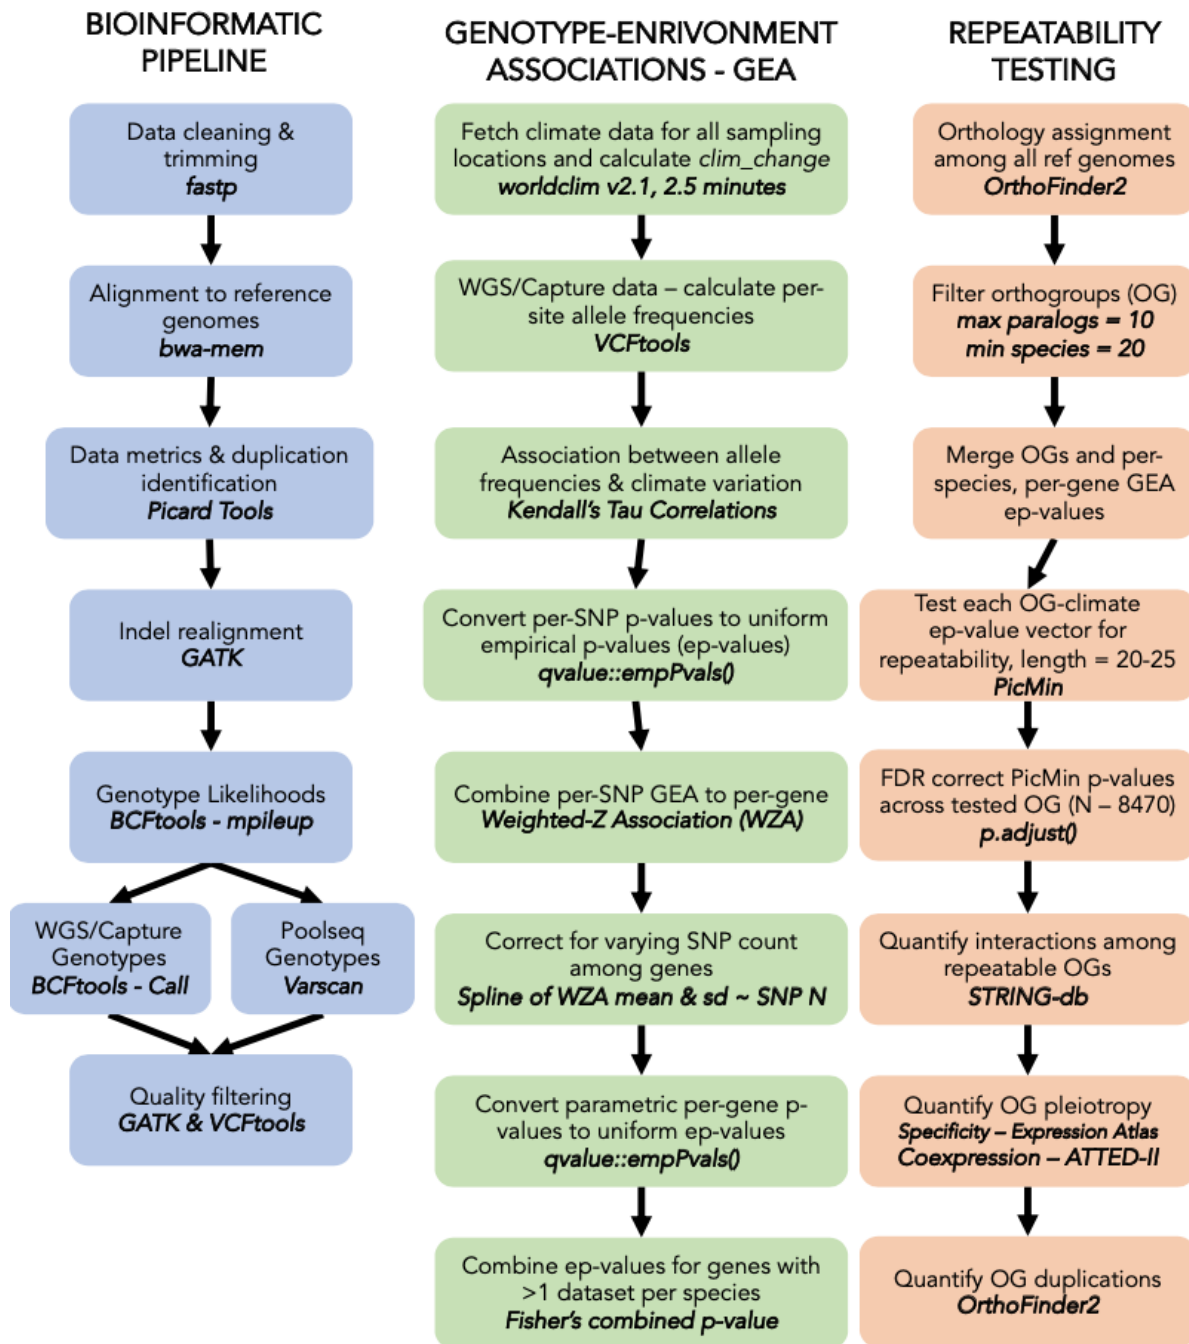

552

553 **Supplementary Figure 1:** Summary of workflows for SNP-calling, GEA and testing for

554 repeatability signatures.

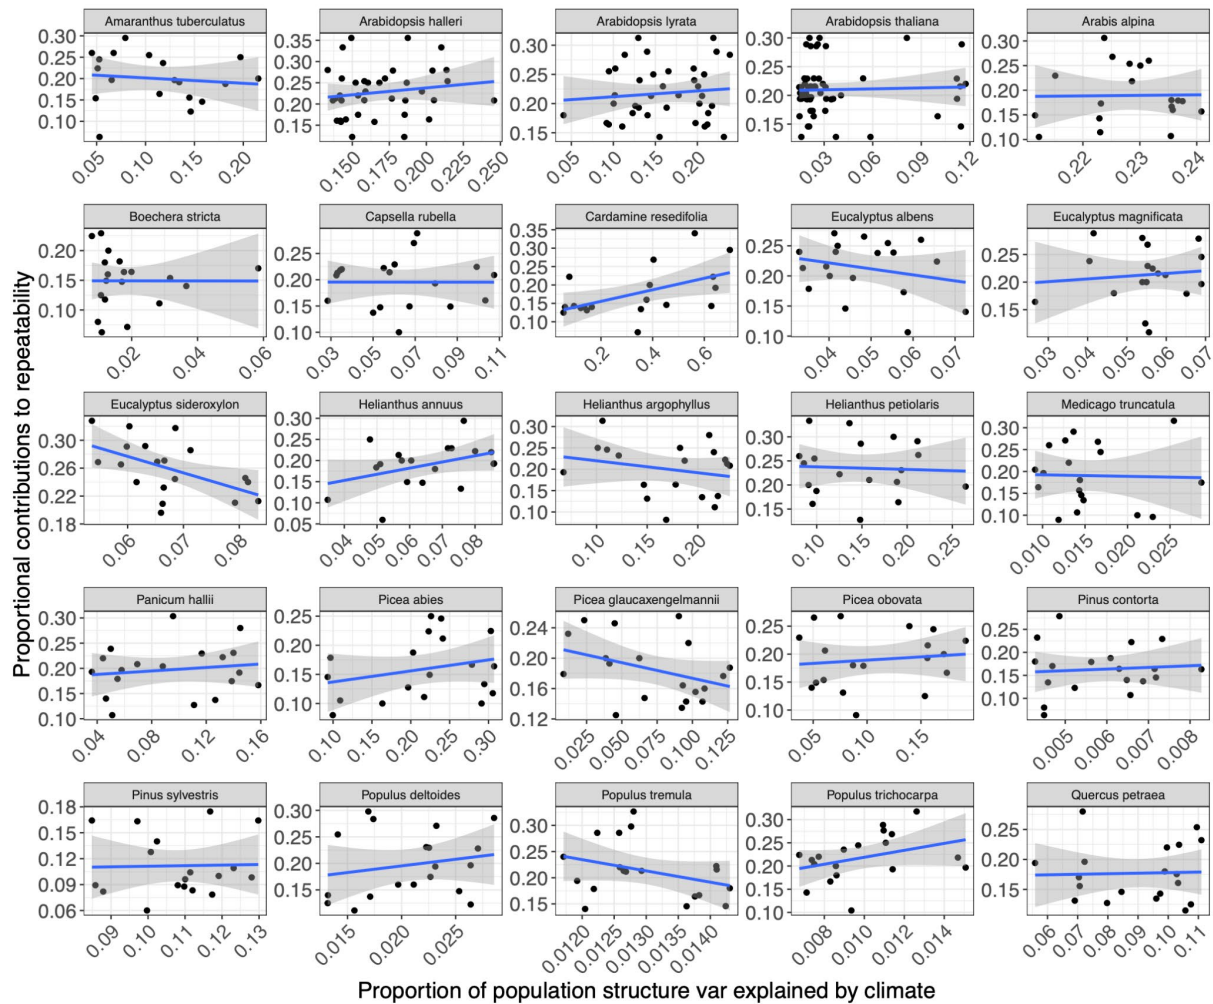

555

556

557 **Supplementary Figure 2:** Associations between GEA power, estimated as in the inverse of  
 558 how much neutral genetic variation is explained by climatic variation, and the extent to  
 559 which an individual species contributes low p-values to RAOs. The y-axis represents the  
 560 proportion of RAOs that include a low p-value (<0.1) from a given species. The x-axis is the  
 561 proportion of neutral genetic variation that is explained by climatic variation, as estimated  
 562 by pRDA. Each point therefore represents a single GEA combination of species and climate  
 563 variable. Linear regression lines and standard error are included to provide a general  
 564 approximation of the relationship.

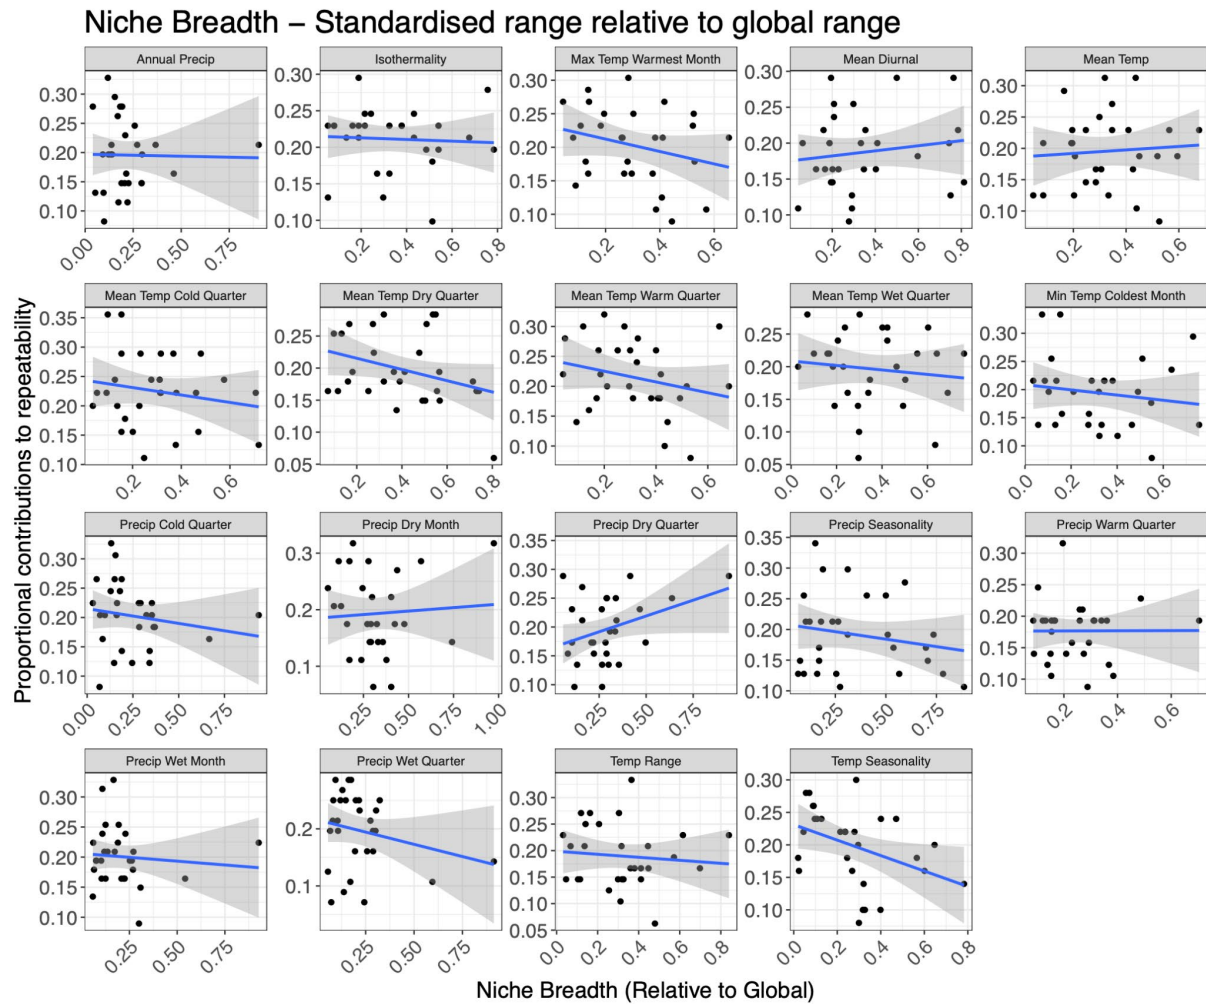

565

566

567 **Supplementary Figure 3:** Associations between Niche Breadth, standardised by the global  
 568 climatic range across all species, and the extent to which an individual species contributes  
 569 low p-values to RAOs. The y-axis represents the proportion of RAOs that include a  
 570 contributing p-value from a given species. Each point therefore represents a single GEA  
 571 combination of species and climate variable. Linear regression lines and standard error are  
 572 included to provide a general approximation of the relationship.

### Niche Breadth – Standardised range relative to species mean

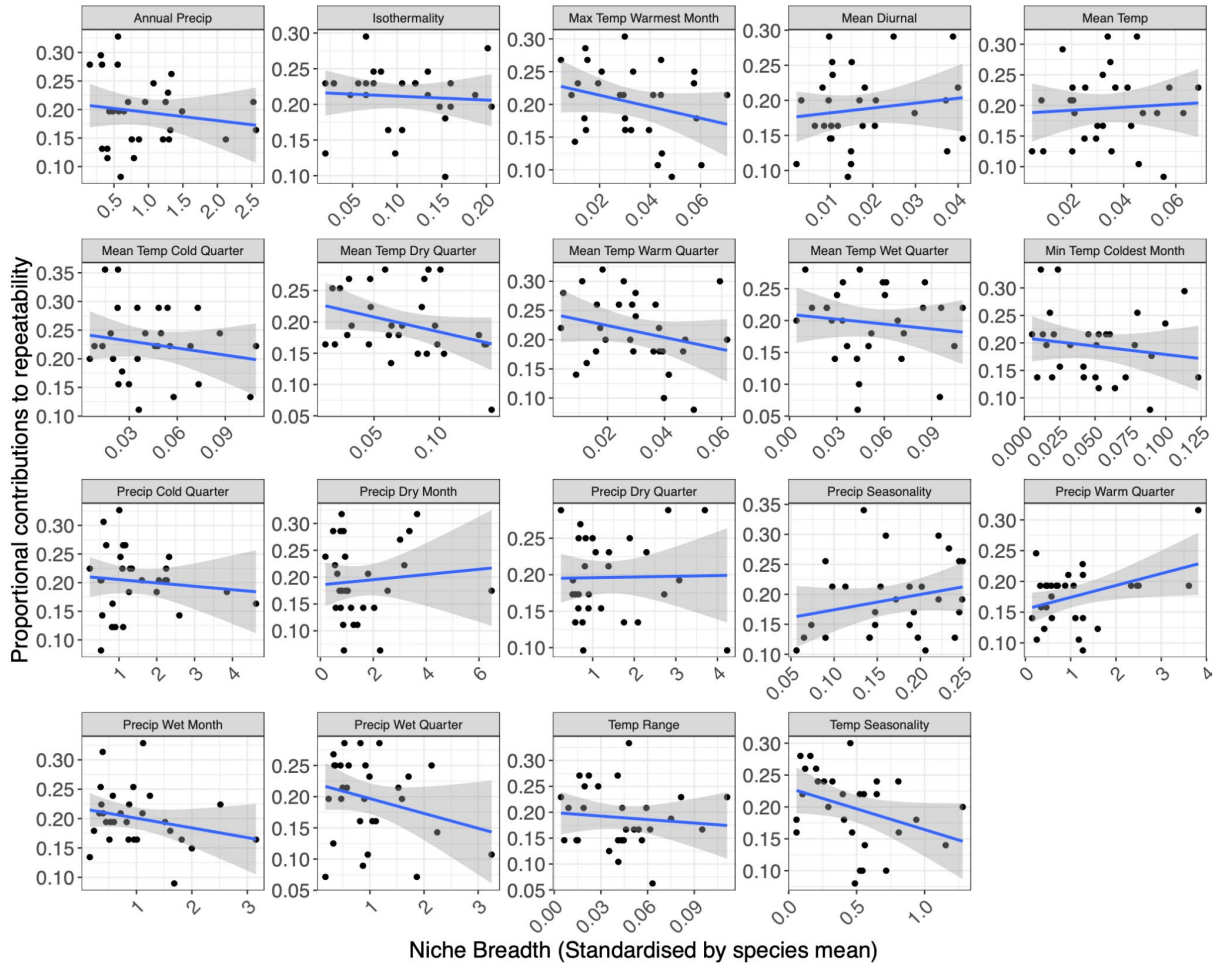

573

574

575 **Supplementary Figure 4:** Associations between Niche Breadth, standardised by the local  
 576 species mean climate, and the extent to which an individual species contributes low p-values  
 577 to RAOs. The y-axis represents the proportion of RAOs that include a contributing p-value  
 578 from a given species. Each point therefore represents a single GEA combination of species  
 579 and climate variable. Linear regression lines and standard error are included to provide a  
 580 general approximation of the relationship.

581

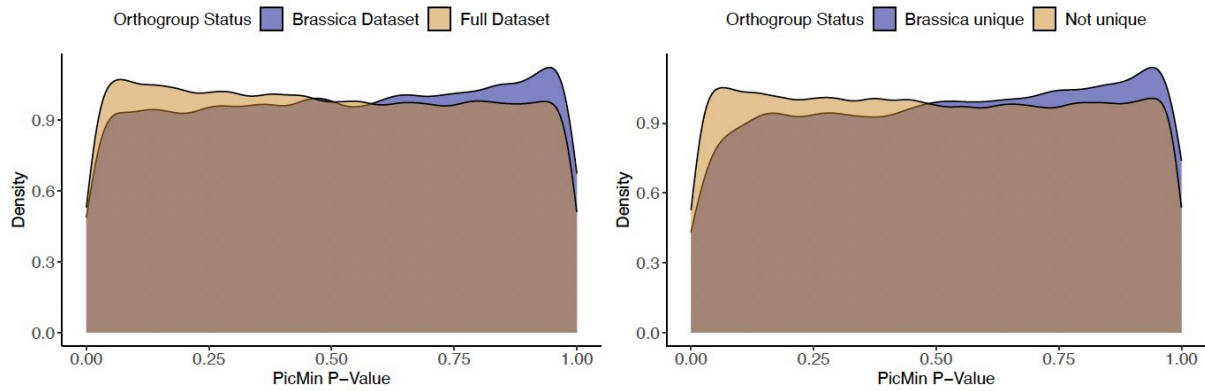

582

583

584 **Supplementary Figure 5:** Distributions of PicMin p-values for tests of repeatability within  
 585 seven Brassicaceae species. In each panel, distributions are coloured according to the status  
 586 of Orthogroups in terms of whether they were tested in the main analysis (left panel) or were  
 587 orthogroups that were unique to Brassicaceae (right panel). Both panels show the same  
 588 result, which implies that the orthogroups with higher degrees of conservation across  
 589 species, that were tested in our main analysis, also exhibit increased evidence for  
 590 repeatability when tested only within Brassicaceae.

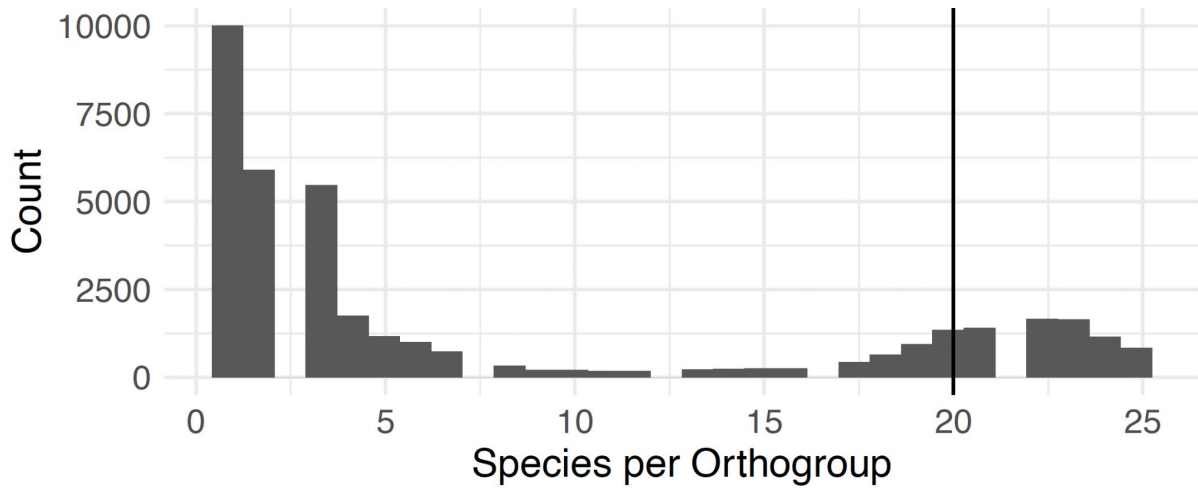

591

592

593

594

**Supplementary Figure 6:** Orthogroup occupancy across species. Histogram shows the distribution of the number of species represented per orthogroup. The black line denotes the cut-off of 20 used for repeatability analyses.



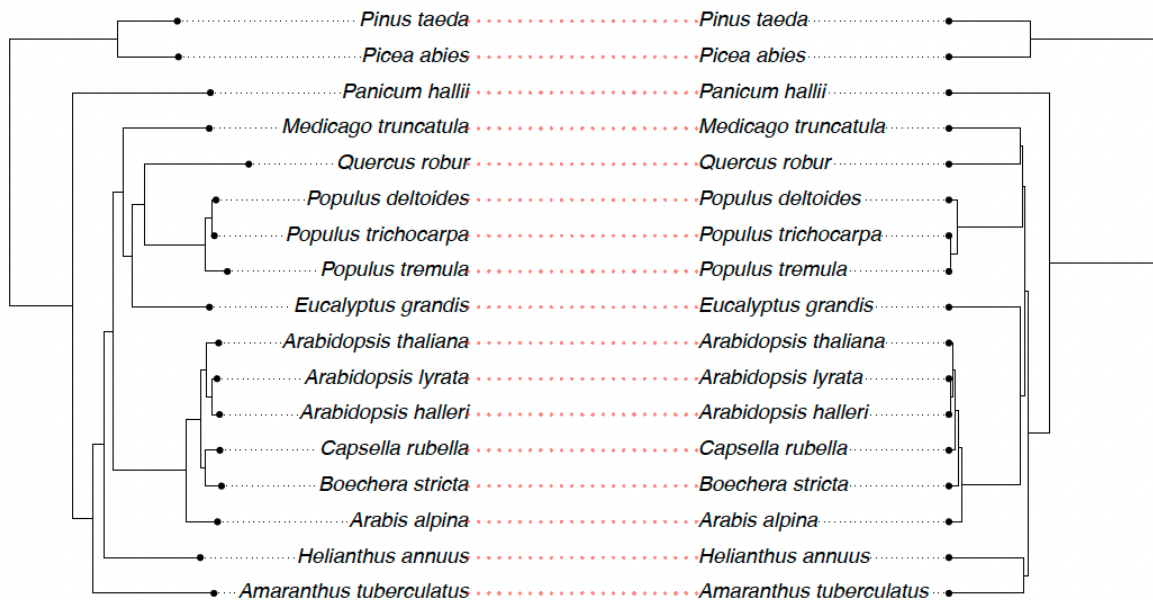

595

596

597

598

599

**Supplementary Figure 7:** Agreement between the species-tree derived here from 5,003 orthogroups from the 17 reference genome including in this study (left), and the species tree described by TimeTree (right), which is shown in Extended Data 1.

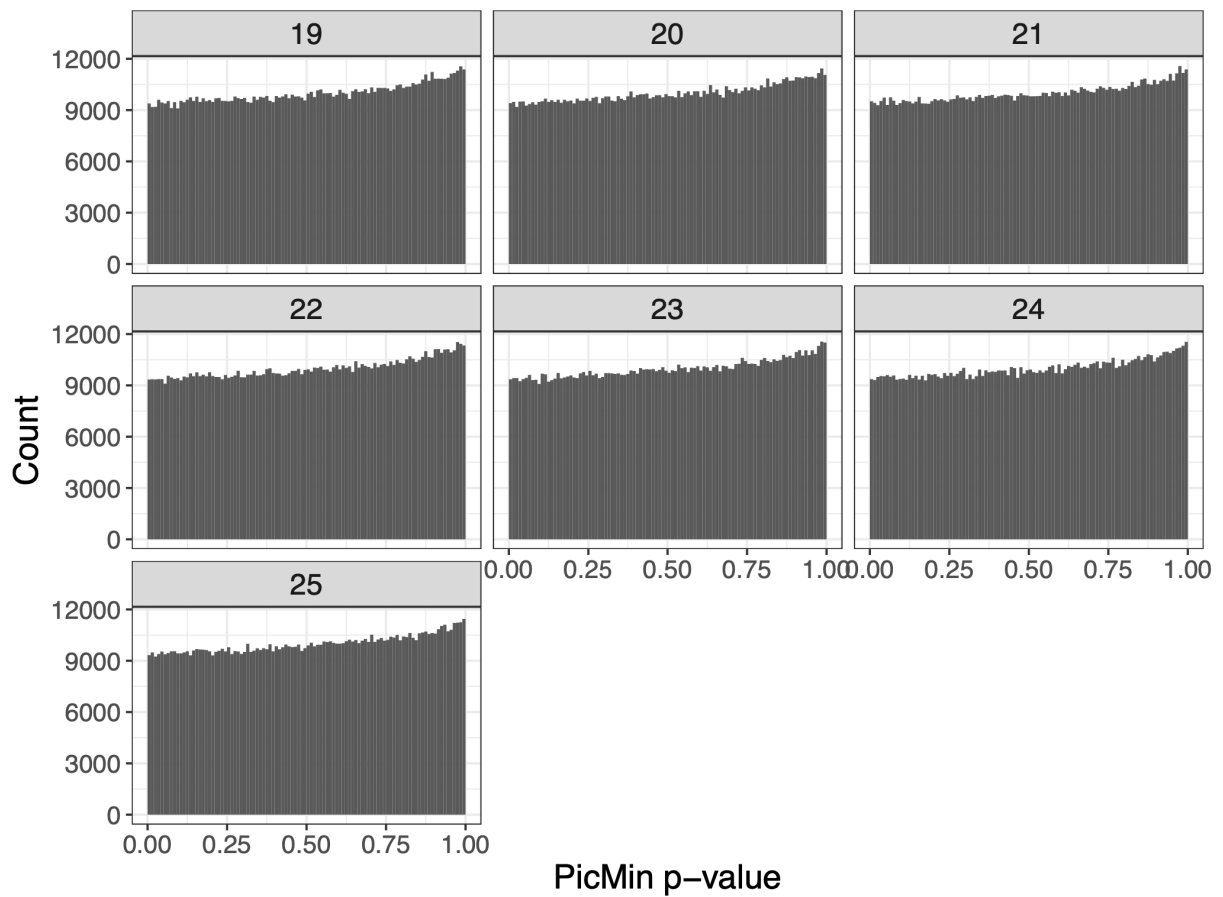

600  
 601  
 602  
 603  
 604  
 605  
 606  
 607

**Supplementary Figure 8:** The distribution of  $p$ -values derived from PicMin under the null model that no species exhibits adaptation within a given orthogroup. Each panel shows the null distribution under a different number of tested species (19-25). These distributions were produced over 1,000,000 orthogroups per number of species derived from random uniform  $e$ -values, and were used as an empirical null distribution to adjust final PicMin  $p$ -values.



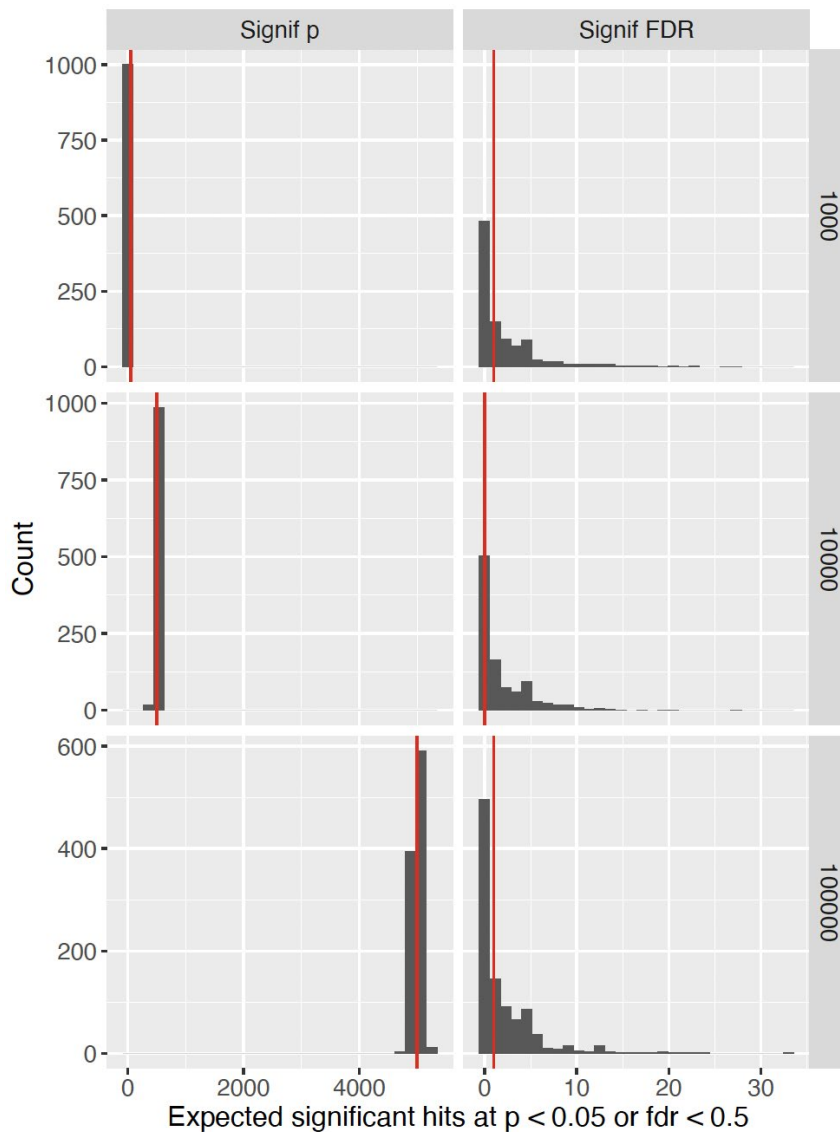

608  
609

610 **Supplementary Figure 9:** Demonstration of the different expectations for  $p$ -values and FDR-  
 611 corrected  $q$ -values when selecting a cut-off. Each histogram represents 1,000 random  
 612 uniform draws of  $p$ -values where all null hypotheses are true, for either 1,000, 10,000, or  
 613 100,000 tests. The 'Signif  $p$ ' column shows the distribution of the number of tests with a  $p$ -  
 614 value  $< 0.05$ , with the median shown as a red line. The expected number of tests with a  $p$ -  
 615 value  $< 0.05$  increases with the number of tests performed (approximately 5% of tests). The  
 616 'Signif FDR' column shows the same data FDR-corrected, with the number of tests with an  
 617 FDR-corrected  $q$ -value  $< 0.5$  (the threshold used here), with the median (either 0 or 1) shown  
 618 as a red line. This simulated data demonstrates that, regardless of the number of tests being  
 619 performed, there is no expectation for many tests to fall below the FDR  $< 0.5$  threshold as  
 620 there is for uncorrected  $p$ -values.

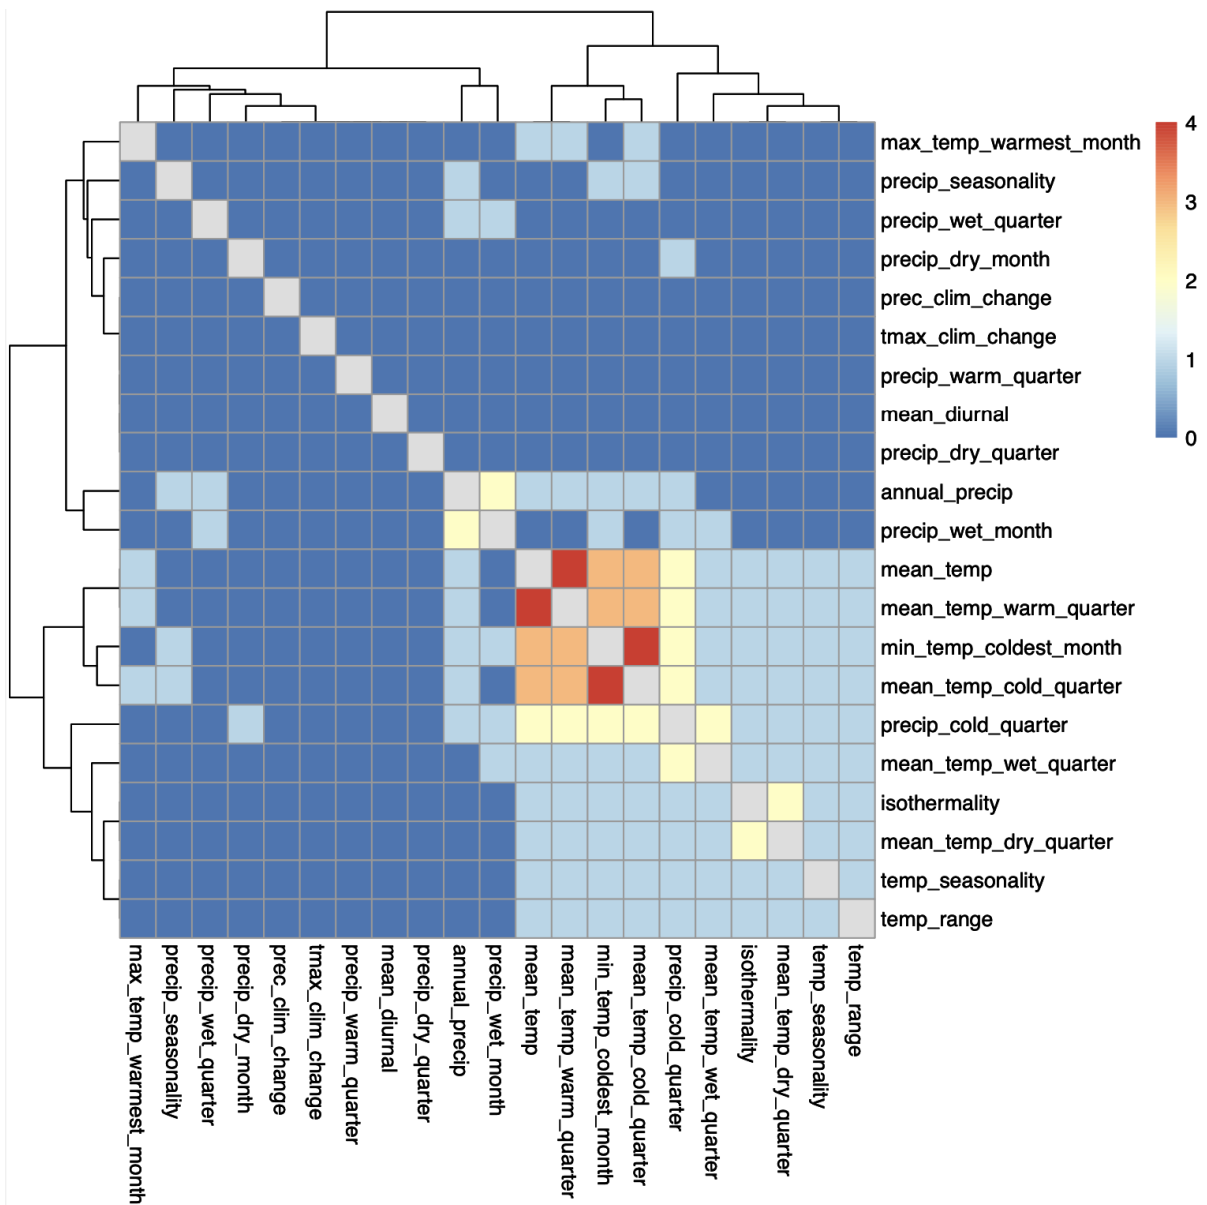

621

622

623 **Supplementary Figure 10:** *Overlap of RAOs (FDR < 0.5) among different climate variables.*

624 *Each cell shows the number of orthogroups that were commonly identified through GEA*

625 *associated with different climate variables. Axes are clustered with dendrograms denoting*

626 *groups of climate variables with the most similar sets of orthogroups identified.*

627

628

629

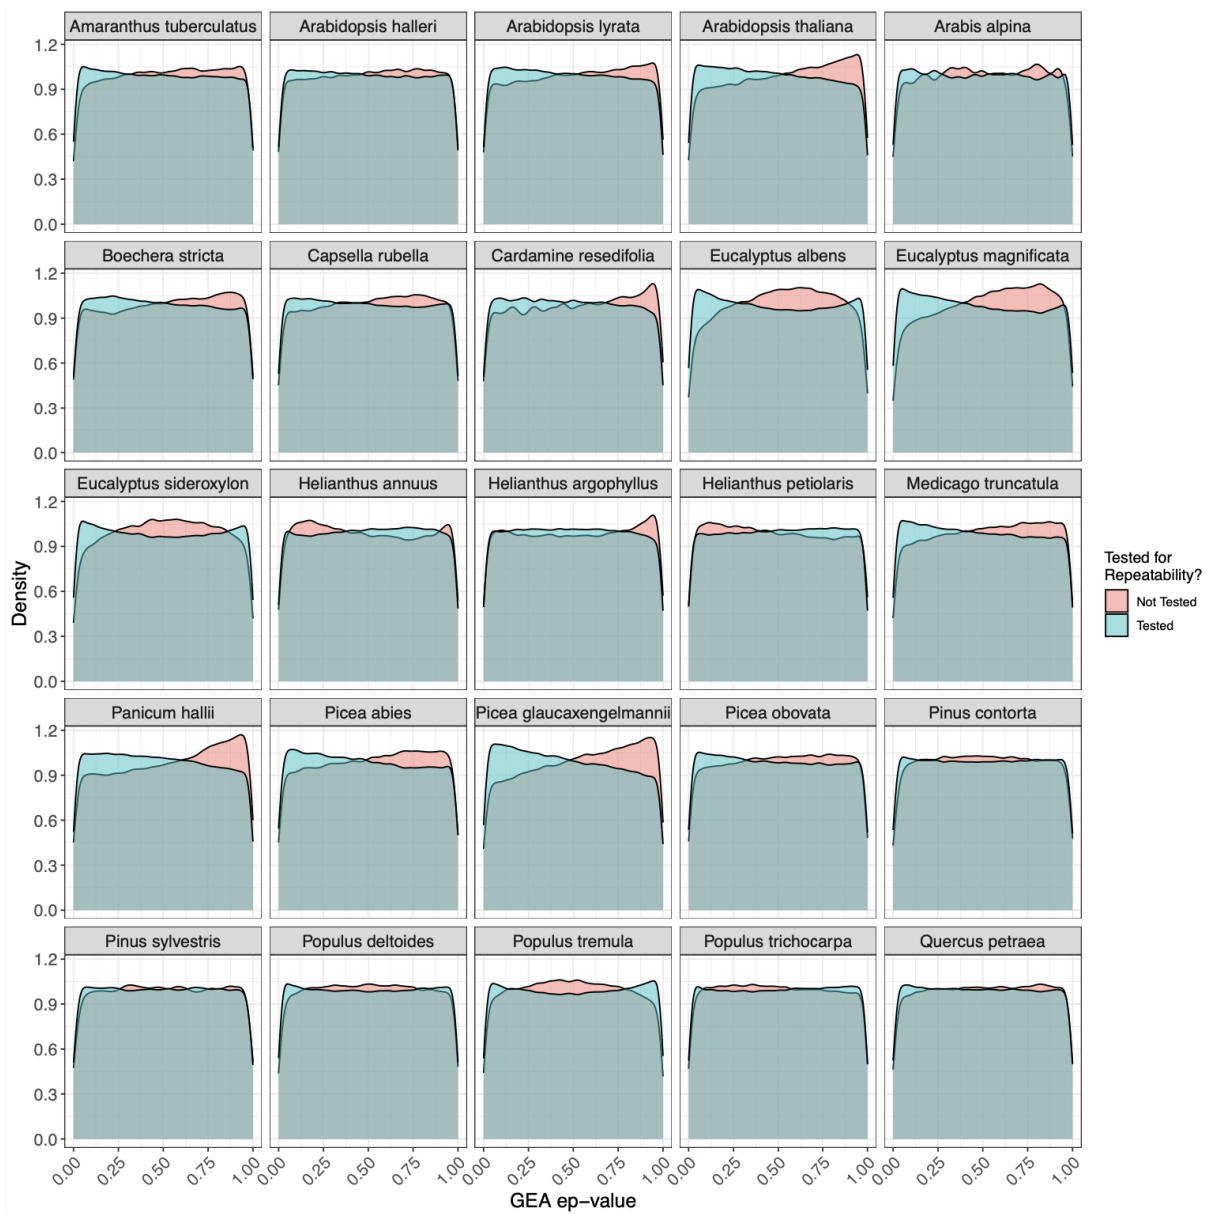

631

632

633 **Supplementary Figure 11:** Density distributions of tested vs not-tested orthogroup GEA ep-

634 values. Each facet shows a different species, and fill denotes whether orthogroups were

635 tested for repeatability or not.

636

637

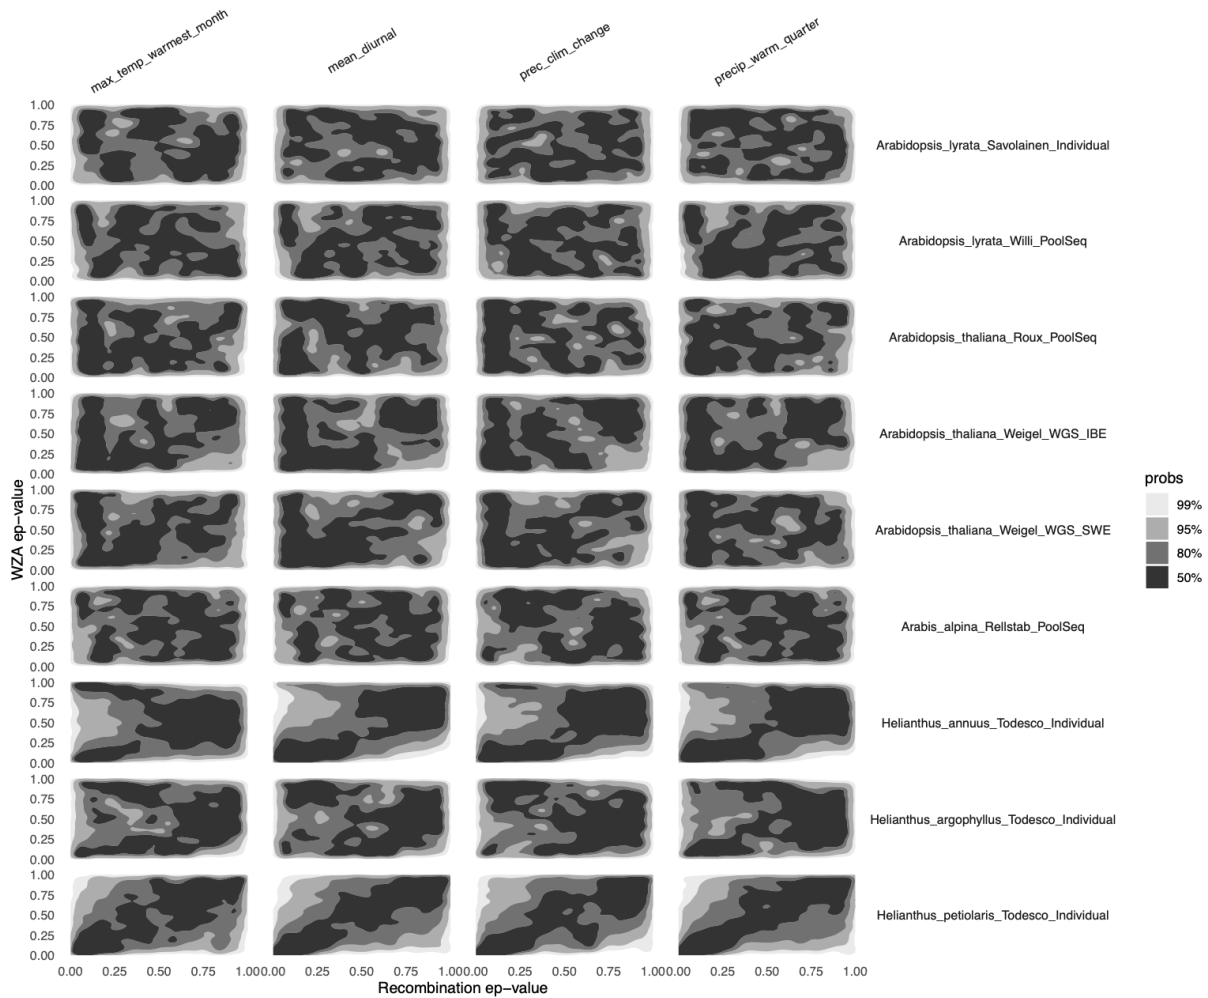

638

639

640 **Supplementary Figure 12:** Associations between GEA results and recombination rate. Each

641 facet shows the density of per gene estimates of association with environment (WZA ep-

642 value corrected for SNP count) and recombination rate (weighted mean, lower ep-value

643 reflects lower recombination). Each axis represents a uniform distribution of empirical p-

644 values, such that if no association exists, regions of high density are observed across the

645 plotting area. Darker regions represent a greater density of genes.

646

647

648 **REFERENCES**

649

- 650 1. Wang, M. *et al.* Phylogenomics of the genus *Populus* reveals extensive interspecific  
651 gene flow and balancing selection. *New Phytol.* **225**, 1370–1382 (2020).
- 652 2. Nikolov, L. A. *et al.* Resolving the backbone of the Brassicaceae phylogeny for  
653 investigating trait diversity. *New Phytol.* **222**, 1638–1651 (2019).
- 654 3. Gautier, M. Genome-Wide Scan for Adaptive Divergence and Association with  
655 Population-Specific Covariates. *Genetics* **201**, 1555–1579 (2015).
- 656 4. Luu, K., Bazin, E. & Blum, M. G. B. pcadapt: an R package to perform genome scans for  
657 selection based on principal component analysis. *Mol. Ecol. Resour.* **17**, 67–77 (2017).
- 658 5. Caye, K., Jumentier, B., Lepeule, J. & François, O. LFMM 2: Fast and Accurate Inference  
659 of Gene-Environment Associations in Genome-Wide Studies. *Mol. Biol. Evol.* **36**, 852–  
660 860 (2019).
- 661 6. Capblancq, T. & Forester, B. R. Redundancy Analysis (RDA): a Swiss Army knife for  
662 landscape genomics. *Methods Ecol. Evol.* (2021) doi:10.1111/2041-210x.13722.
- 663 7. Lotterhos, K. E. The Effect of Neutral Recombination Variation on Genome Scans for  
664 Selection. *G3* **9**, 1851–1867 (2019).
- 665 8. Lasky, J. R., Josephs, E. B. & Morris, G. P. Genotype-environment associations to reveal  
666 the molecular basis of environmental adaptation. *Plant Cell* (2022)  
667 doi:10.1093/plcell/koac267.
- 668 9. DeRaad, D. A. *et al.* Genome-environment association methods comparison supports  
669 omnigenic adaptation to ecological niche in malaria vector mosquitoes. *Mol. Ecol.*  
670 (2021) doi:10.1111/mec.16094.
- 671 10. Lasky, J. R. *et al.* Genome-environment associations in sorghum landraces predict

- 672 adaptive traits. *Sci Adv* **1**, e1400218 (2015).
- 673 11. Booker, T. R., Yeaman, S., Whiting, J. R. & Whitlock, M. C. The WZA: A window-based  
674 method for characterizing genotype–environment association. *Mol. Ecol. Resour.* (2023)  
675 doi:10.1111/1755-0998.13768.
- 676 12. Lotterhos, K. E. The paradox of adaptive trait clines with nonclinal patterns in the  
677 underlying genes. *Proc. Natl. Acad. Sci. U. S. A.* **120**, e2220313120 (2023).
- 678 13. Schlichta, F., Peischl, S. & Excoffier, L. The Impact of Genetic Surfing on Neutral  
679 Genomic Diversity. *Mol. Biol. Evol.* **39**, (2022).
- 680 14. Karunaratne, P., Zhou, Q., Lascoux, M. & Milesi, P. Hybridization mediated range  
681 expansion and climate change resilience in two conifers. *bioRxiv* 2023.01.31.526517  
682 (2023) doi:10.1101/2023.01.31.526517.
- 683 15. Birchler, J. A. & Yang, H. The multiple fates of gene duplications: Deletion,  
684 hypofunctionalization, subfunctionalization, neofunctionalization, dosage balance  
685 constraints, and neutral variation. *Plant Cell* **34**, 2466–2474 (2022).
- 686 16. Revell, L. J. phytools: an R package for phylogenetic comparative biology (and other  
687 things). *Methods Ecol. Evol.* **3**, 217–223 (2012).
- 688 17. Blomberg, S. P., Garland, T., Jr & Ives, A. R. Testing for phylogenetic signal in  
689 comparative data: behavioral traits are more labile. *Evolution* **57**, 717–745 (2003).
- 690 18. Bohutínská, M. & Peichel, C. L. Divergence time shapes gene reuse during repeated  
691 adaptation. *Trends Ecol. Evol.* (2023) doi:10.1016/j.tree.2023.11.007.
- 692 19. Junker, R. R., Kuppler, J., Bathke, A. C., Schreyer, M. L. & Trutschnig, W. *Dynamic range*  
693 *boxes* – a robust nonparametric approach to quantify size and overlap of *n*-dimensional  
694 hypervolumes. *Methods Ecol. Evol.* **7**, 1503–1513 (2016).
- 695 20. Yeaman, S. *et al.* Convergent local adaptation to climate in distantly related conifers.

- 696 *Science* **353**, 1431–1433 (2016).
- 697 21. Guillaume, F. & Otto, S. P. Gene functional trade-offs and the evolution of pleiotropy.  
698 *Genetics* **192**, 1389–1409 (2012).
- 699 22. Booker, T. R., Yeaman, S. & Whitlock, M. C. Using genome scans to identify genes used  
700 repeatedly for adaptation. *Evolution* (2022) doi:10.1093/evolut/qpac063.
- 701 23. Jiao, W.-B. *et al.* Improving and correcting the contiguity of long-read genome  
702 assemblies of three plant species using optical mapping and chromosome  
703 conformation capture data. *Genome Res.* **27**, 778–786 (2017).
- 704 24. Härmälä, T., Mattila, T. M., Leinonen, P. H., Kuittinen, H. & Savolainen, O. Role of seed  
705 germination in adaptation and reproductive isolation in *Arabidopsis lyrata*. *Mol. Ecol.*  
706 **26**, 3484–3496 (2017).
- 707 25. Rowan, B. A. *et al.* An Ultra High-Density *Arabidopsis thaliana* Crossover Map That  
708 Refines the Influences of Structural Variation and Epigenetic Features. *Genetics* **213**,  
709 771–787 (2019).
- 710 26. Huang, K. *et al.* Mutation Load in Sunflower Inversions Is Negatively Correlated with  
711 Inversion Heterozygosity. *Mol. Biol. Evol.* **39**, msac101 (2022).
- 712 27. Todesco, M. *et al.* Massive haplotypes underlie ecotypic differentiation in sunflowers.  
713 *Nature* **584**, 602–607 (2020).

714  
715  
716
